# Supplementary material for: Mapping and spatial distribution of relict charcoal hearths across Poland
Source: Copernicus journal article supplement (doi:10.5194/essd-18-493-2026), 2026-01-19
Supplement: Supplementary file 1 [file Supplement S1.pdf › Supplement S1.pdf]

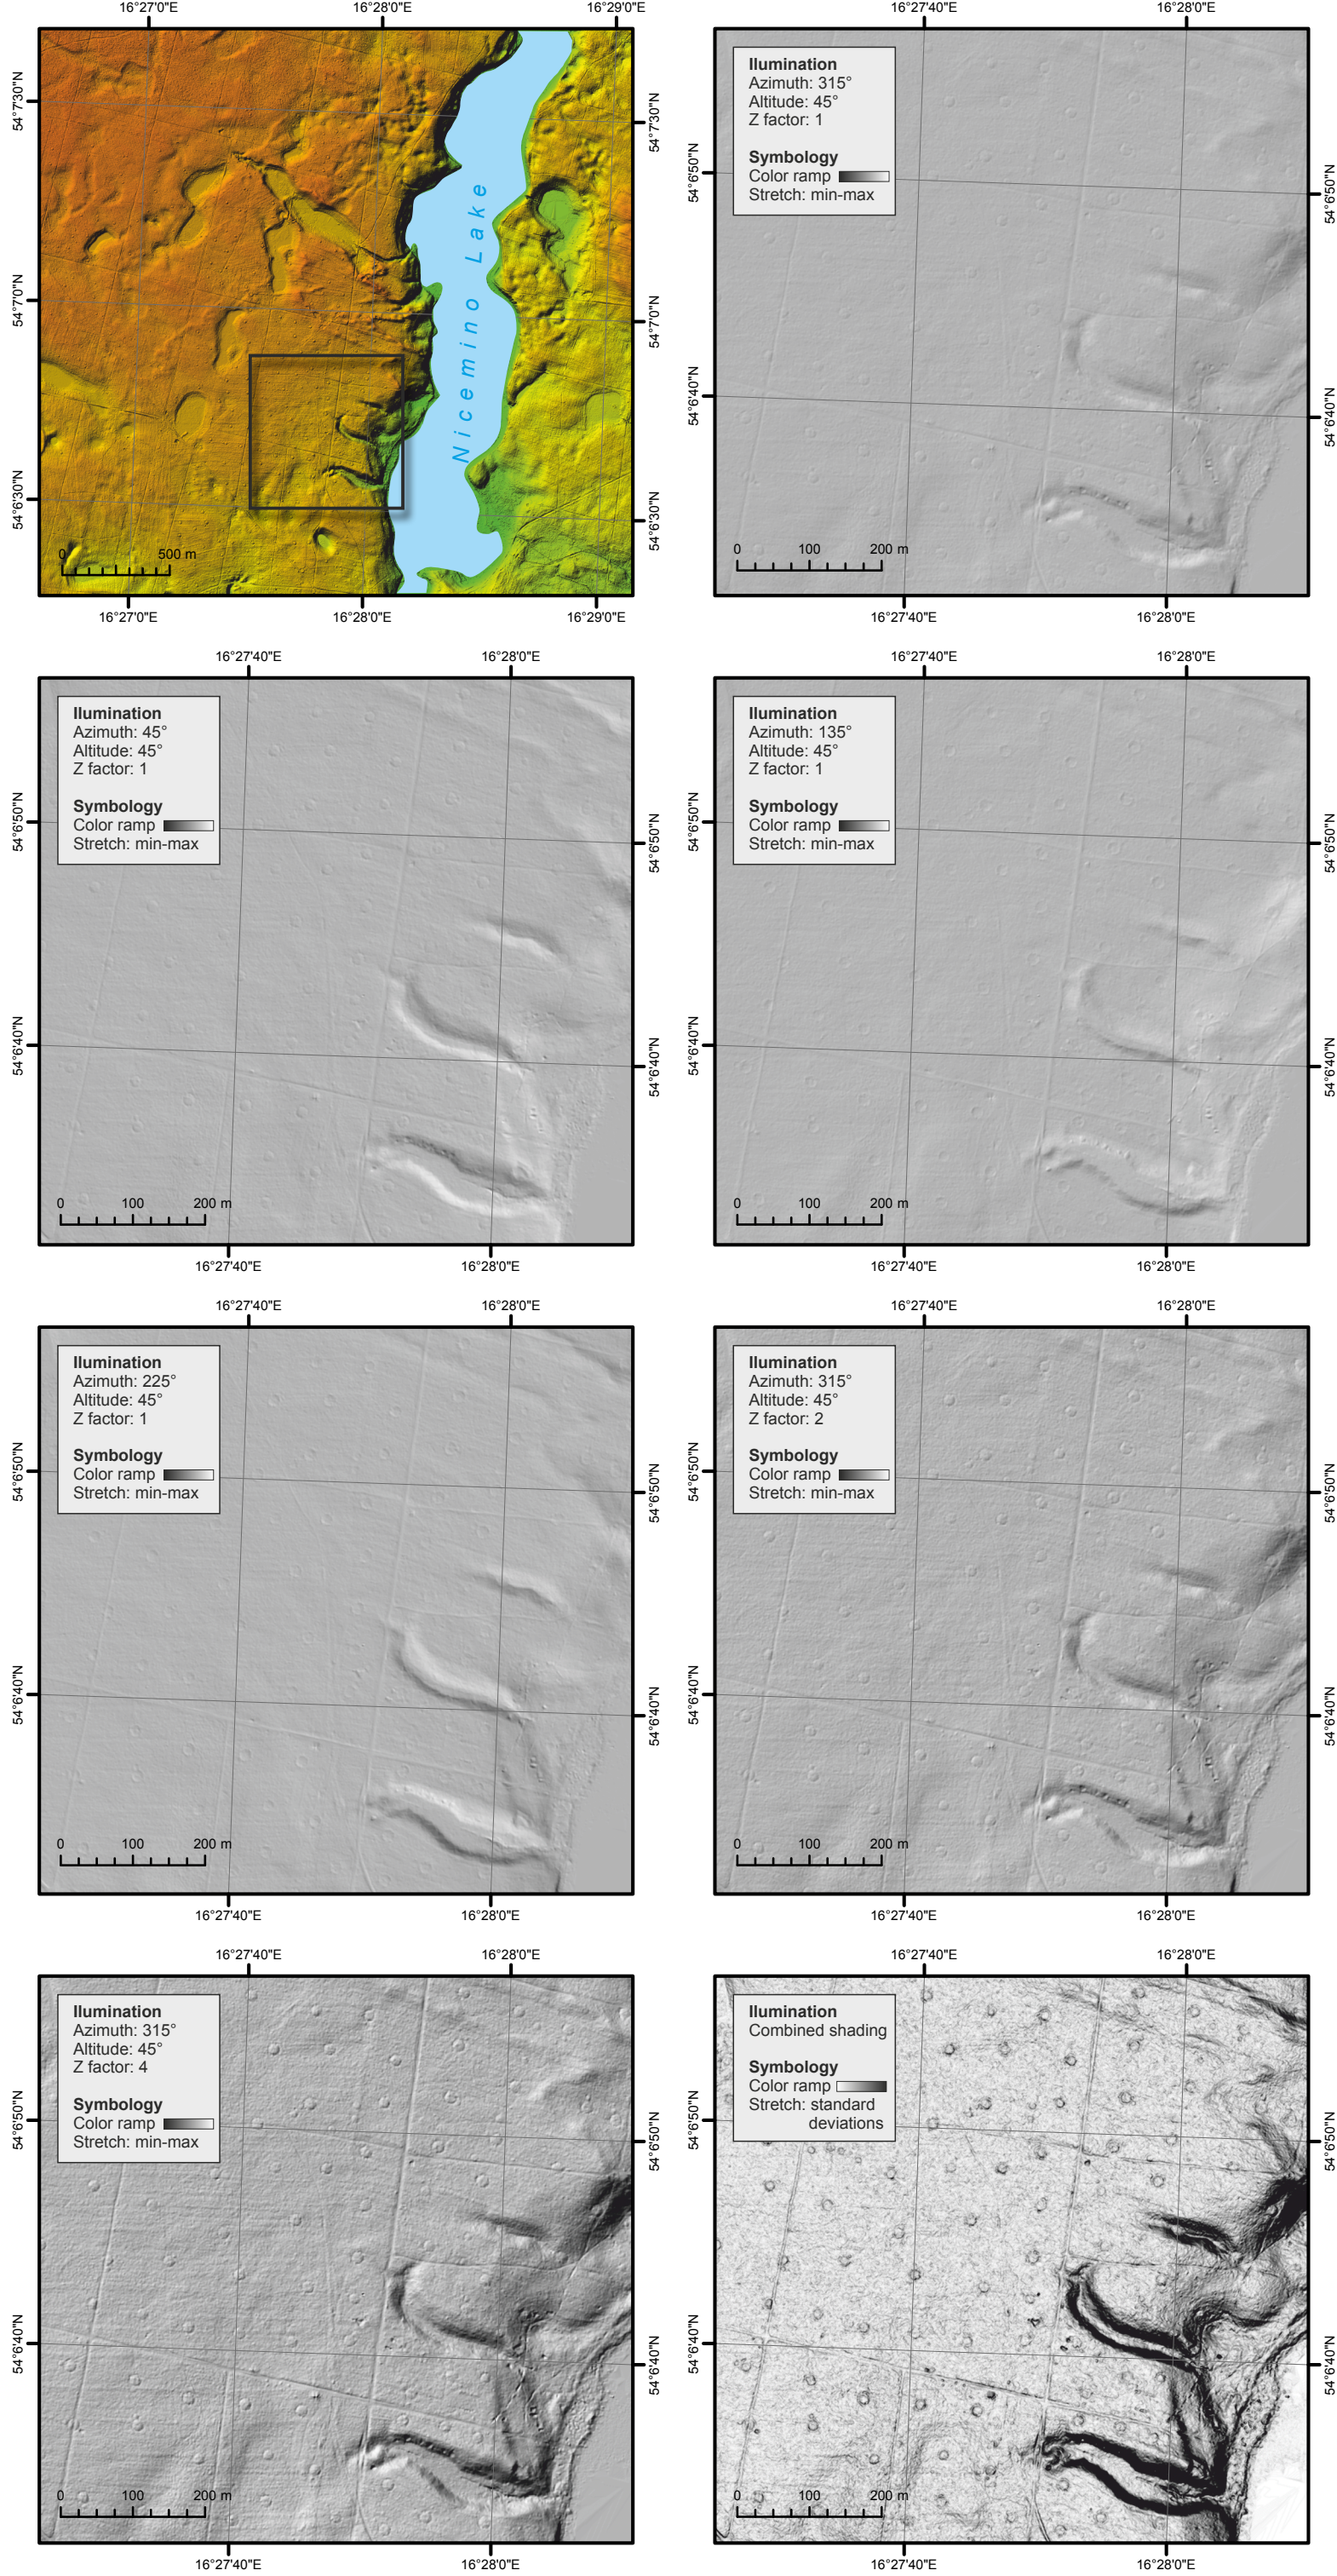

Figure S1. Visibility of Relict Charcoal Hearth microrelief in ALS-derived bare-earth DTM: effect of illumination azimuth (45°, 135°, 225°, 315°) and vertical exaggeration (Z = 1–4); example site (54°6'40"N; 16°28'E).
