# Supplementary material for: Mapping and spatial distribution of relict charcoal hearths across Poland
Source: Copernicus journal article supplement (doi:10.5194/essd-18-493-2026), 2026-01-19
Supplement: Supplementary file [file essd-18-493-2026-supplement-title-page.pdf › essd-18-493-2026-supplement-title-page.pdf]

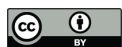

## *Supplement of*

# **Mapping and spatial distribution of relict charcoal hearths across Poland**

**Michał Słowiński et al.**

*Correspondence to:* Michał Słowiński ([michal.slowinski@igipz.pan.pl](mailto:michal.slowinski@igipz.pan.pl))

- [essd-18-493-2026-supplement-title-page.pdf](#)
- [Supplement S1.pdf](#)
- [Supplement S2.pdf](#)

The copyright of individual parts of the supplement might differ from the article licence.
