# Supplementary figures and images for: Mapping and spatial distribution of relict charcoal hearths across Poland
Source: Copernicus journal article supplement (doi:10.5194/essd-18-493-2026), 2026-01-19

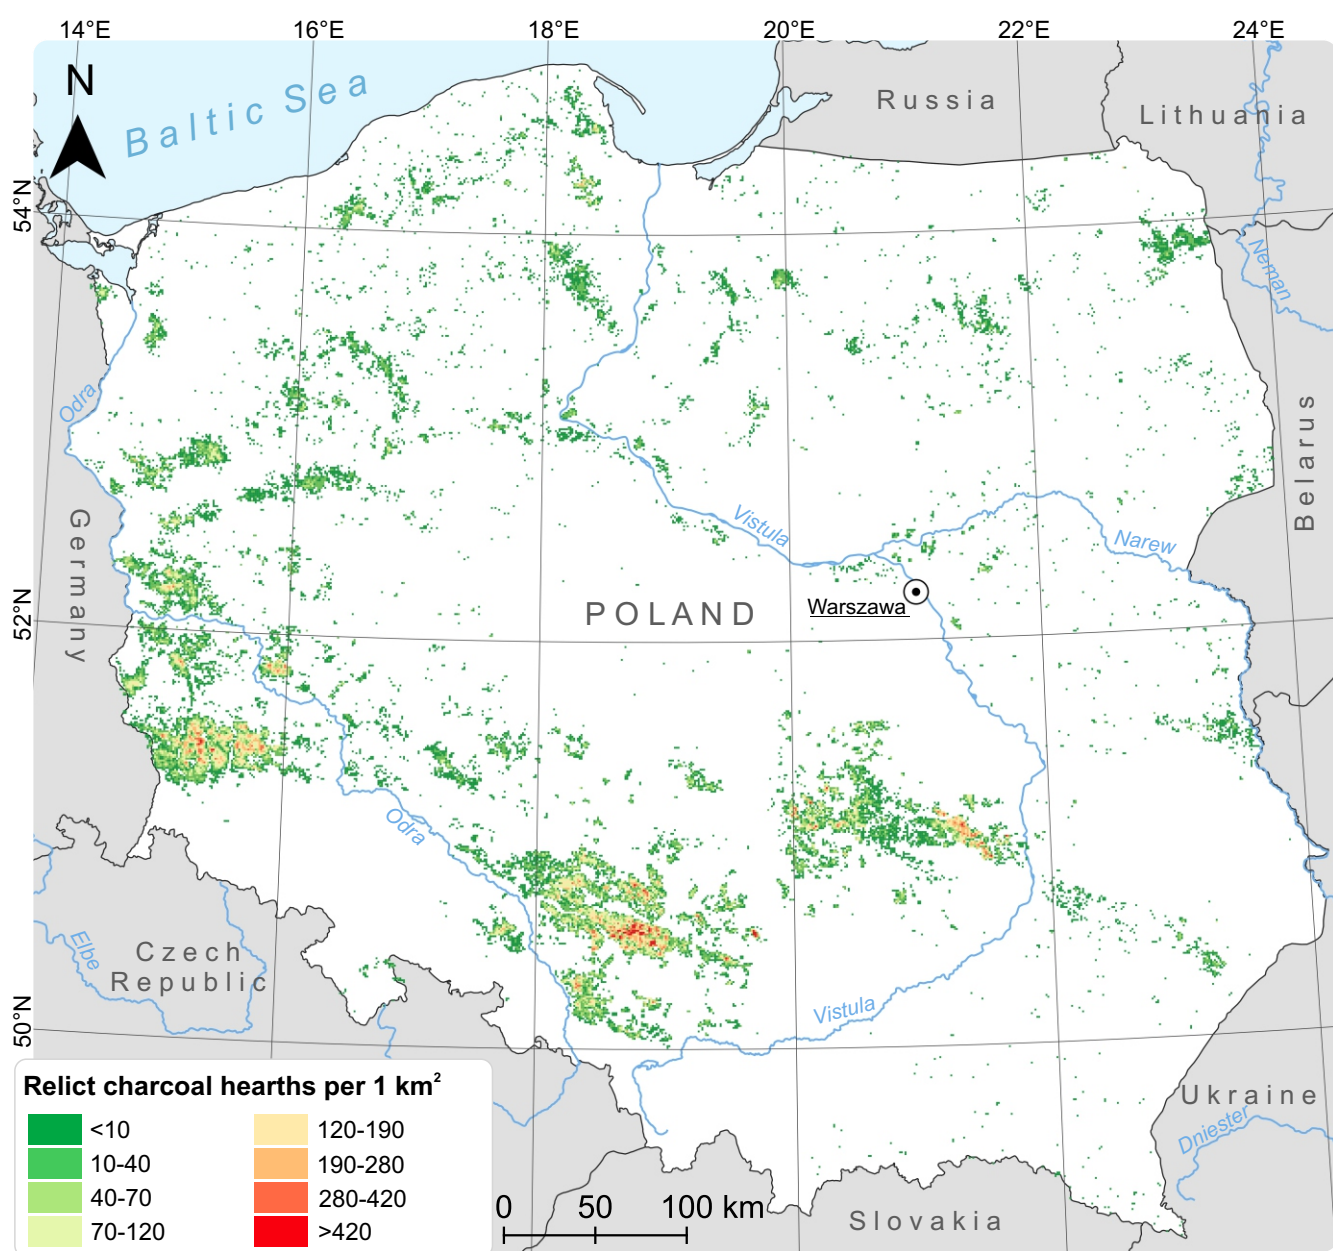

Supplement: Supplementary file 2 [file Supplement S2.pdf › Supplement S2.pdf]
